# Supplementary material for: Land use and land cover change based on historical space-time model
Source: Copernicus journal article supplement (doi:10.5194/se-2016-70), 2016-06-16
Supplement: Supplementary file [file se-2016-70-AC1-supplement.pdf]

# Land use and land cover change based on historical space-time model

Qiong Sun, Chi Zhang, Min Liu, Yongjing Zhang\*

Tourism Institute of Beijing Union University, Beijing, 100101, China

## Abstract

Land use and cover change is a leading edge topic in the current research field of global environmental changes and case study of typical areas is an important approach understanding global environmental changes. Taking the Qiantang River (Zhejiang, China) as an example, this study explores automatic classification of land use using remote sensing technology and analyzes historical space-time change by remote sensing monitoring. This study combines spectral angle mapping (SAM) with multi-source information and creates a convenient and efficient high precision land use computer automatic classification method which meets the application requirements and is suitable for complex landform of the studied area. This work analyzes the histological space-time characteristics of land use and cover change in the Qiantang River basin in 2001, 2007 and 2014, in order to i) accurately understand the change of land use and cover as well as historical space-time evolution trend, provide a realistic basis for the sustainable development of the Qiantang River basin, ii) and provide a strong information support and new research method for optimizing the Qiantang River land use structure and achieving optimal allocation of land resources and scientific management.

**Key words:** Qiantang River; land use; land cover; space-time model; remote sensing technology

## 1 Introduction

Land use refers to all human land development and use activities on purpose, and agricultural land, forestry land, industrial land, land for transportation and residential land are different types of land (Olang et al., 2014; Ochoa et al., 2016; Muñoz-Rojas et al., 2015). Land use is closely related to land cover, in which, the former occurs on the surface of the earth and the latter is the product of various surface processes including land use (Verburg et al., 2014). Land use and land cover have particular time and space attributes, and their form and feature changes in a variety of space and time scales, which generates a series of ecological environmental effects (de Muelenaere et al., 2014).

With the development of science and technology nowadays, human is able to acquire earth observation remote sensing data and the understanding of earth surface evolves to a new stage, which provides a more powerful and convenient way of acquiring land use and land cover information, and land use and land cover mapping has gained the most widely application in the satellite earth observation field (Gessesse et al., 2015). The methods for studying remote sensing data mainly include static remote sensing image analysis method and dynamic remote sensing image analysis method.

Static remote sensing image analysis refers to analyzing land cover distribution and changes in different periods through processing remote sensing data in some fixed time phase based on field investigation or

39 historical data and then dividing them into different categories. Dynamic remote sensing image analysis  
40 method refers to analyzing land cover information in different periods by comparing remote sensing data  
41 in different time phases. The method is usually used for studying land cover condition in the period when  
42 remote sensing data has been existed, because remote sensing data has only existed for decades.  
43 Research on land use and land cover is closely associated with the development of mapping and remote  
44 sensing technology (Gelaw et al., 2015; Zhang et al., 2000). Remote sensing has large advantage when  
45 being applied in researches on land use because it can observe the whole picture of an area  
46 simultaneously or observing the same area repeatedly. Remote sensing can observe and monitor rapidly  
47 changing system, for instance, land-marine-atmosphere energy exchange, ocean current, atmospheric  
48 ozone, etc., as well as **system changing** in a slow way (Ferreira et al., 2015; Amuti and Luo, 2014). By  
49 using spectral angle mapping (SAM) and multi-source information, this study analyzes land use and land  
50 cover in the Qiantang River based on historical space-time model, aiming to provide a powerful  
51 information support for the optimization of land use structure in the Qiantang River in Zhejiang and the  
52 reasonable allocation of land resource and a new approach for research analysis.

## 54 **2 Materials and methods**

56 The Qiantang River basin has complicated landforms, with 70% of mountains and hills, 30% of plain and  
57 basin and 10% of rivers and lakes. The Qiantang River follows through mountainous and hilly land in  
58 western Zhejiang. Except the northeast side which faces with the East China Sea, the other sides are  
59 surrounded by mountains. It is separated by north-east trend mountain chains. The basin is high in the  
60 southwest and low in the northeast and covered by many hills and few plains. **There are mountains**  
61 **around and inside the drainage basin, more than ten of which are 1500-1800 meters above sea level,**  
62 **such as Liugujian at the source of Xinan River and Qingliang Peak of Baiji Mountain (Xu et al., 2013).**

63 The Qiantang River basin is located in middle subtropical zone, near ocean, and has frequent monsoon  
64 activities. Winter is sunny and cold; spring is dominated by rainy days and rainy season comes in March  
65 and is over in June; July and August is a period with high temperature and drought, typhoon and  
66 rainstorm appear frequently; autumn usually has fresh air and invigorating climate (Xu et al., 2014). The  
67 annual average temperature of the basin is 16.1 ~ 17.7 °C and the annual rainfall capacity is 1200 ~  
68 2200 mm (Xia et al., 2014).

69 Affected by superior hydrothermal conditions and complex topography, plants in the Qiantang River  
70 basin are rich in species and types. Zonal vegetation in the basin is mid-subtropical evergreen  
71 broad-leaved forest. A majority of native forest vegetations have been destroyed due to human activity  
72 and interference for thousands of years, and some secondary natural evergreen broad-leaved forests  
73 survive only in local district where has inconvenient transportation and steep slope (Xia et al., 2016).

74 The Qiantang River, 605 km long, originated from Xiuning Country of Anhui province (China) crosses  
75 Anhui, Zhejiang, Jiangxi and Fujian (China). The Qiantang River abundant in water (average runoff:  
76 43.458 billion m<sup>3</sup>) has various functions in electricity generation, flood control, drink, cultivation, irrigation,  
77 transportation, visit, etc. Main streams of the Qiantang River basin, 583 km long, are made up of  
78 Qiantang River, Fuchun River, Xin'an River, Lan River, Heng River, Changshan port and Majin rivulet.

79 Main streams above Fuchun power station are mountain-rivers with steep slope and hurry flow, and tidal  
 80 river reaches are below Fuchun River, with large tidal range in the estuary, which belongs to strong tidal  
 81 estuary. Main tributary includes Jiangshan Harbor, Lingshan Harbor, Wuxi River, Jinhua River,  
 82 Shouchang River, Pujiang River and Fengshui River (Su et al., 2011). The map of the Qiantang River  
 83 basin is shown in Figure 1 (Shen et al., 2013).  
 84

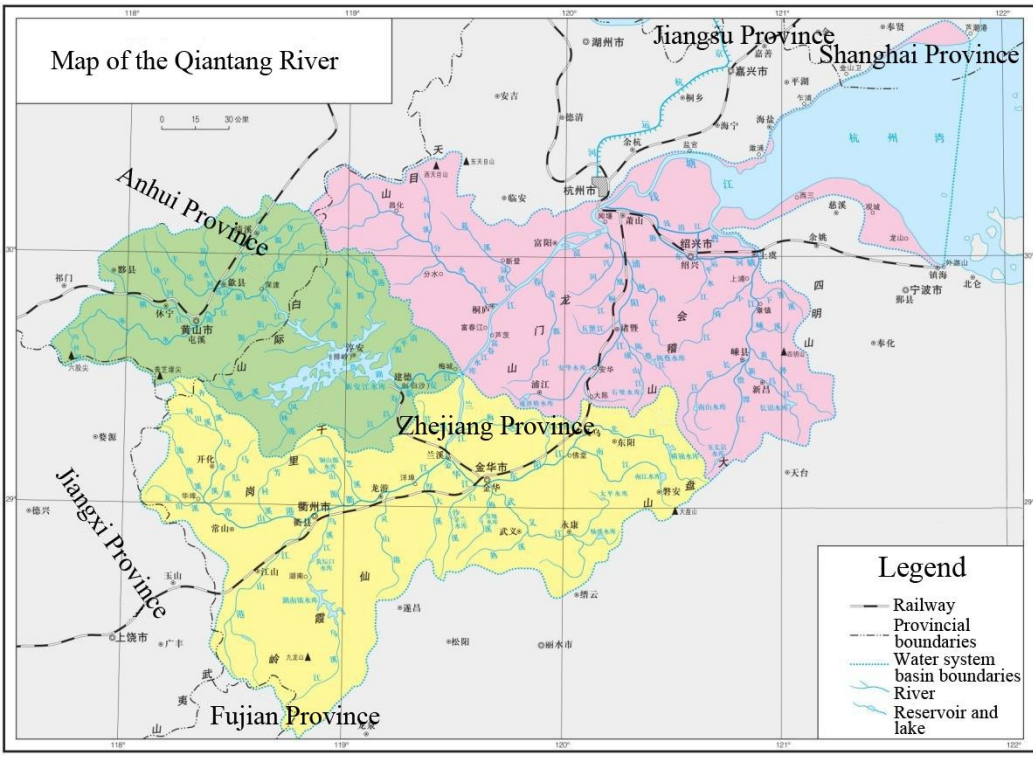

85  
 86 Figure 1 Map of the Qiantang River  
 87

88 **2.2 Land use and cover automatic classification method based on spectral angle mapping**  
 89 **and multi- source information**

90 Multi-source information

91 (1) Topographic data

92 Digital line graph (DLG) (1:50000) is used in this study as a topographic data source. Relying on  
 93 ArcGIS analysis function (Xiao et al., 2012), triangular irregular network (TIN) can be generated from  
 94 DLG and then transformed into digital elevation model (DEM). Then, the gradient and slope aspect  
 95 information are extracted.

96

97 (2) Normalization indexes

98 Normalized differential vegetation index (NDVI), the optimal indicative factor for plant growth condition  
 99 and spatial distribution density, is lineally associated with plant distribution cover degree, which is the  
 100 most widely used vegetation index. Water reflection is weakened gradually from visible light to

101 middle-infrared band, and water has the strongest absorption in near-infrared and middle-infrared band  
102 and almost reflects nothing. Zhao et al (Zhao and Chen, 2005) compared difference value using  
103 TM/ETM + the 5<sup>th</sup> and 6<sup>th</sup> band and also established normalized difference bare index (NDBal) in the  
104 study of TM/ETM + bare soil image extraction.

105

106 Classification methods

107 (1) Basic principle of **spectral angle mapping**

108 Spectral angle mapping confirms the similarity between a test spectrum and a reference spectrum by  
109 calculating their angle (Li et al., 2014). Reference spectrum can be the pixel spectrum extracted from  
110 laboratory or field or images. This method assumes that image data have been cut to “apparent  
111 reflection”, that is to say, all dark radiation and path radiation deviations have been eliminated. SAM  
112 confirms the similarity between test spectrum  $t_i$  and reference spectrum  $r_i$  through the following formula:

113

$$114 \quad \alpha = \cos^{-1} \left[ \frac{\sum_{i=1}^{n_j} t_i r_i}{\left( \sum_{i=1}^{n_b} t_i^2 \right)^{\frac{1}{2}} \left( \sum_{i=1}^{n_b} r_i^2 \right)^{\frac{1}{2}}} \right] \quad (1)$$

115

116 Herein,  $n$  stands for the number of wavebands. The formula seems like solving the angle between two  
117 vectors. Spectral reflectance ratio of ground object can be regarded as a vector. If total illumination  
118 increases or decreases, the length of the vector will increase or decrease accordingly, but the angle  
119 direction remains unchanged.

120

121 (2) Classification process

122 This study is designed to acquire corresponding topographic data from digital line graph and extract  
123 various normalized index information from TM image, and then, perform SAM classification and  
124 precision evaluation by recombining various multi- source information on TM image. Mixed division of  
125 paddy field, dry field and woodland, i.e., whether the consistent vector directions of paddy field, dry yield  
126 and woodland in six-dimensional space of original spectral information will induce the low prevision of  
127 image classification or not is analyzed according to precision evaluation results in test area and  
128 verification results in verification area, and finally, conclusions are reached.

129

130 (3) Data standardization and training sample selection

131 Before SAM classification, normalized index information is standardized between 0 and 255 by earth  
132 resource data analysis system (ERDAS) modeling. Samples are selected for training after the optimal  
133 waveband combinations are chosen. Pixel samples (300 dpi) in each area are selected to ensure large  
134 differences between spectral vector angles.

135

136 **2.3 Brief introduction of land use and cover analysis method**

137 (1) Single dynamic degree of land use and cover

138 Single dynamic degree of land use and cover refers to the number of some kind of land use and cover  
139 change in a certain time in a study area (Sanjuán et al., 2016), and its expression formula is:

140 
$$K = \frac{U_b - U_a}{U_a} \times \frac{1}{T} \times 100\%$$
 (2)

141 Where k stands for the dynamic degree of some kind of land use and cover in a certain study time;  $U_a$   
142 stands for the number of some kind of land use and cover at the beginning of the study;  $U_b$  stands for the  
143 number of some kind of land use and cover types in the end of the study; T stands for the length of  
144 research period. K is considered as annual changing rate of some kind of land use and cover type in the  
145 study area when T is set as year.

146 (2) Dynamic degree of comprehensive land use and cover

147 Dynamic degree of comprehensive land use and cover refers to the number of land use change in a  
148 certain time in a study area, and its expression formula is:

149 
$$LC = \left[ \frac{\sum_{i=1}^n \Delta LU_{i-j}}{2 \sum_{i=1}^n LU_i} \right] \times \frac{1}{T} \times 100\%$$
 (3)

150 Herein,  $LU_i$  stands for the area of ith land use and cover type at the beginning of monitoring;  $LU_{i,j}$  stands  
151 for the absolute value of i land use and cover type transforming into non-i land use and cover type in the  
152 monitoring time; T is study phase. LC value is considered to be annual changing rate of land use and  
153 cover in the study area when T is set as year.

154 (3) Comprehensive index of land use and cover

155 Comprehensive index of land use and cover in a study area can be expressed as:

156 
$$L_j = 100 \times \sum_{i=1}^n A_i \times C_i$$
 (4)

157 Where  $L_j$  stands for comprehensive index of land use and cover in a study area;  $A_i$  stands for grading  
158 index of level i land use and cover in the area;  $C_i$  stands for area percentage of level i land use and cover  
159 grading in the area; n stands for the number of land use and cover grading.

160 (4) Analysis of change degree of land use and cover

161 The change of land use and cover in a certain range is the result of changes of various types of land use  
162 and cover types, and land use and cover as well as its variation and change rate can quantitatively  
163 reveal the overall level and change trend of land use and cover in the range (Yu et al., 2014; Belay et al.,  
164 2015). Variation and change rate of land use and cover can be expressed as:

165 
$$\Delta L_{b-a} = L_b - L_a = 100 \times \left( \sum_{i=1}^n A_i \times C_{ib} - \sum_{i=1}^n A_i \times C_{ia} \right)$$
 (5)

$$R = \frac{\sum_{i=1}^n (A_i \times C_{ib}) - \sum_{i=1}^n (A_i \times C_{ia})}{\sum_{i=1}^n (A_i \times C_{ia})} \quad (6)$$

167 Herein,  $L_a$  stands for regional land use and cover comprehensive index at time a;  $L_b$  stands for regional  
 168 land use and cover comprehensive index at time b;  $A_i$  stands for level i land use and cover grading index;  
 169  $C_{ia}$  stands for area percentage of level i land use and cover at time a in an area;  $C_{ib}$  stands for area  
 170 percentage of level i land use and cover at time b in an area;  $L_{b-a}$  stands for variable quantity of land use  
 171 and cover; R stands for change rate of land use and cover.

172 (5) Information entropy of land use and cover structure

173 “Entropy”, a concept of thermodynamics, is considered as a random variable without restriction in  
 174 information theory (Sato and Suganuma, 2013). The size of entropy can be used to describe average  
 175 uncertainty degree in probability system and analyze complex land use and cover structure with the help  
 176 of the concept of entropy in a thorough and quantitative way. Information entropy (H) is defined as  
 177 follows based on Shannon entropy formula:

$$H = -\sum_{i=1}^n P_i \times \ln P_i \quad (7)$$

179 Where information entropy H is used to describe the diversity of land use and cover;  $P_i$  stands for the  
 180 proportion of land type i. The diversity index is considered as 0 when the area has not been developed,  
 181 i.e.,  $H_{\min}=0$ ; various land types have been stable and meet entropy maximization conditions and the  
 182 diversity index is maximum when the area has been fully developed, i.e.,  $H_{\max}=\ln N$  (n stands for land use  
 183 and cover types).

184 (6) Degree of balance and dominance

185 Information entropy of land use structure is calculated according to actual number of functions, and the  
 186 value is usually comparable. Therefore, it is quite necessary to introduce the concept of degree of  
 187 balance (Zhu et al., 2008). Based on information entropy formula, degree of balance is expressed as:

$$J = \frac{H}{H_m} = -\left[ \sum_{i=1}^n P_i \times \ln P_i \right] \text{ and } \ln N$$

$$I = 1 - J \quad (8)$$

190 Where J stands for degree of balance,  $E \in [0, 1]$ , urban land use and cover is in an uneven state when E  
 191 is equal to zero, and land use and cover types reach an ideal and balanced situation when E is equal to 1.  
 192 I stand for degree of dominance, the larger degree of dominance tends to show larger mean value of  
 193 land use and cover and more balanced land distribution. Hence, compared with information entropy, the  
 194 index is more intuitive and comparable (Garedew et al., 2009).

195

### 196 3. Results

#### 197 3.1 Mathematical model analysis methods for land use and cover

198

199 Single dynamics of land use and cover types in the Qiantang River basin from 2001 to 2007, 2007 to  
 200 2014 and 2001 to 2014 is shown in table 1. As a whole, the number of paddy field and dry land is  
 201 reduced, while forest land, water area and building land increase from 2001 to 2014, in which, building  
 202 land changes the fastest while forest land changes the slowest.

203 It can be seen from dynamic degree index of comprehensive land use and cover in table 1 that the  
 204 number of dry land changes greatest from 2001 to 2014, followed by building land and paddy field, and  
 205 forest land changes is the minimum. As a whole, the rate and number of building land change fastest and  
 206 frequently from 2001 to 2014; dry land changes slowly but the number of dry land changes greatest; the  
 207 changing rate and number of paddy field occupy the third place among all types of land. Therefore, dry  
 208 land and paddy field belong to sensitive land types in the Qiantang River basin. Water area changes fast,  
 209 but the number changes little, which is consistent with season-related change in water area. The change  
 210 speed of forest land change is the slowest and its number change is also the most unobvious, which is  
 211 consistent with the fact that the total area of forest is the largest and the roll-in and roll-out changes are  
 212 mild. Details are shown in figure 2.

213 Table 1 Dynamic degree of land use and cover types in the Qiantang River basin

| Year      | Types (km <sup>2</sup> ) | Dynamic degree of single land use and cover (%) | Dynamic degree of comprehensive land use and cover (%) |
|-----------|--------------------------|-------------------------------------------------|--------------------------------------------------------|
|           | Paddy field              | -1.42                                           | 8.01                                                   |
|           | Dry land                 | -2.31                                           | 11.13                                                  |
| 2001-2007 | Forest land              | 0.18                                            | 0.39                                                   |
|           | Water area               | 3.05                                            | 1.87                                                   |
|           | Building land            | 4.71                                            | 7.52                                                   |
|           | Paddy field              | -1.23                                           | 8.57                                                   |
|           | Dry land                 | -2.96                                           | 12.06                                                  |
| 2007-2014 | Forest land              | 0.29                                            | 0.49                                                   |
|           | Water area               | 4.53                                            | 1.61                                                   |
|           | Building land            | 6.12                                            | 5.96                                                   |
|           | Paddy field              | -1.29                                           | 4.23                                                   |
|           | Dry land                 | -2.56                                           | 7.98                                                   |
| 2001-2014 | Forest land              | 0.25                                            | 0.23                                                   |
|           | Water area               | 3.72                                            | 0.89                                                   |
|           | Building land            | 5.93                                            | 4.82                                                   |

214

215

216

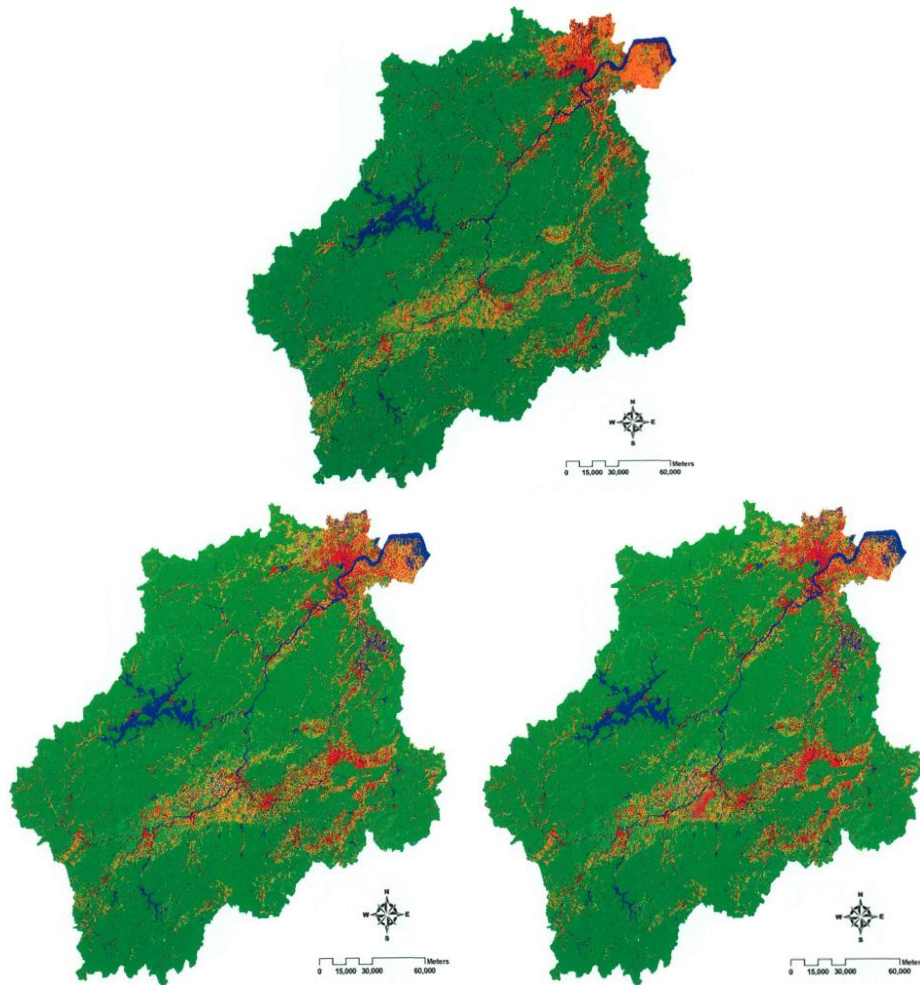

217

218

219

220 **Figure 2 Spectral angle mapping based automatic classification of land use and cover of the Qiantang**  
221 **River basin in year 2001, 2007 and 2014 (orange: paddy field; light green: dry field; dark green: forest**  
222 **land; dark blue: water area; red: construction land)**

223

### 224 **3.2 Analysis of land use and cover degree**

225 As shown in table 2, the Qiantang River basin had relatively higher land use and cover, and land use and  
226 cover comprehensive index increased to 233.3582 in 2014 from 232.8926 in 2001. It indicated that land  
227 use and cover comprehensive index increased gradually from 2001 to 2014, which suggested that land  
228 use and cover in the basin were deepening from 2001 to 2014. **The development of social economy is**  
229 **one of the leading factors for land use and cover change and the development of economy predicts the**  
230 **increase of building land.**

231 It can be known from table 2 that land use and cover in the Qiantang River basin developed and  
232 deepened continuously in two stages (2001-2007 and 2007-2014), and land use and cover change rate  
233 was larger from 2001 to 2007 than from 2007 to 2014, which showed that the Qiantang River basin  
234 developed rapidly from 2001 to 2007. **Gross Domestic Product (GDP) of Hangzhou was 156.801 billion**  
235 **yuan in 2001, 410.401 billion in 2007, and 920.116 billion in 2014. The growth of GDP from 2001 to 2007**



236 was faster than that from 2007 to 2014, which was consistent with the above analysis results.

237

238 Table 2 Land use and cover comprehensive index, variation and change rate in the Qiantang River basin

|                  | Comprehensive index of land use and cover |          |          | Land use and cover variation quantity |           |           | Land use and cover degree change ratio (%) |           |           |
|------------------|-------------------------------------------|----------|----------|---------------------------------------|-----------|-----------|--------------------------------------------|-----------|-----------|
|                  | 2001                                      | 2007     | 2014     | 2001-2007                             | 2007-2014 | 2001-2014 | 2001-2007                                  | 2007-2014 | 2001-2014 |
| <b>The basin</b> | 232.8926                                  | 233.0125 | 233.3582 | 0.1562                                | 0.1249    | 0.2811    | 0.0602                                     | 0.0816    | 0.1418    |

239

### 240 3.3 Information entropy and balance degree of land use and cover structure

241 Calculation results of land use and cover structural information entropy in 2001, 2007 and 2014 are  
242 displayed in table 3.

243 It could be seen from table 3 that land use and cover information entropy in the Qiantang River basin  
244 touched the bottom in 2001, suggesting that land use and cover system had a higher degree of order  
245 and stronger constitutive property at that time. However, it reached the highest in 2014, which indicated  
246 that land use system increased in degree of disorder and had the minimum degree of order and poor  
247 constitutive property. Monotonic increasing land use and cover information entropy elaborated that land  
248 use and cover system in the area developed to a relatively disordered state, and land use and cover  
249 structure became more complicated.

250 As shown in table 3, degree of balance of land use and cover structure in the Qiantang River basin from  
251 2001 to 2014 increases continuously and degree of dominance is reduced, which indicated that land use  
252 and cover structure in the Qiantang River basin is more complicated, the degree of balance is higher and  
253 lands are more evenly distributed as economy develops rapidly. To date, land use and cover structure in  
254 the Qiantang River basin becomes more and more harmonious.

255 Table 3 land use and cover structure, information entropy and degree of balance and dominance in the Qiantang  
256 River basin in 2001, 2007 and 2014

|                            | 2001   | 2007   | 2014   |
|----------------------------|--------|--------|--------|
| <b>Paddy field%</b>        | 12.96  | 11.56  | 10.43  |
| <b>Dry land%</b>           | 11.86  | 10.12  | 9.63   |
| <b>Forest land%</b>        | 67.93  | 68.45  | 69.15  |
| <b>Water area%</b>         | 3.85   | 4.06   | 4.37   |
| <b>Building land</b>       | 4.09   | 5.02   | 5.98   |
| <b>Number of functions</b> | 5      | 5      | 5      |
| <b>Information entropy</b> | 1.0203 | 1.0296 | 1.0312 |
| <b>Degree of balance</b>   | 0.6351 | 0.6332 | 0.6362 |
| <b>Degree of dominance</b> | 0.3639 | 0.3623 | 0.3601 |

257

## 258 4 Discussion

259 Land use and cover data is the basis of investigation on global environmental change and also the key  
260 factor in the study of earth surface activity progress; the exploration involves fields like biochemical  
261 circle, plant biomass distribution, climate change and atmospheric circulation. Many research results  
262 suggested that, recent land use was associated to a large number of industrial and agricultural activities  
263 inevitably; land use has gained a great and fast change in the past fifty years, especially in the width and  
264 depth. These changes are usually along with the economic increase and population boom as well as the  
265 change of production and living (Fuller et al., 2012).

266 It has been known to all that, the change of economy and population is testing the bearing capacity of  
267 biological natural environment and biological damage and resource exhaustion will occur if it exceeds  
268 the bearing capacity. Therefore, to relieve biological risks, ensure the normal production and living of  
269 people, and implement the concept of sustainable development, various countries have input a large  
270 number of manpower and material resources for relevant studies; various research achievement is  
271 playing a positive role.

272 Currently, research on changes of land use in China concentrates on area with active human activities  
273 and natural motivation, especially developed areas such as Beijing, Yangtze River delta and Shenzhen  
274 and fragile environmental area under the effects of population increase area, economical development  
275 and resource consumption such as northeast China region and Yulin region in transitional zone between  
276 arid and semiarid regions. Zhejiang Qiantang River researched in this study belongs to the first category.  
277 Differing from those hot research area such as Guangzhou and Shanghai (Fan et al., 2007; Yin et al.,  
278 2011), Qiantang River is seldom researched. The Qiantang River basin locating in the west of Zhejiang  
279 province is one of Zhejiang top eight river systems and also the largest river in Zhejiang province.  
280 Moreover, the basin has rich agricultural resources and a long development history. It is always the  
281 important area for comprehensive development of agriculture, forest, grazing, subsidiary business and  
282 fishing and breeds Zhejiang civilization. Changes of land use and cover in the basin are obvious in the  
283 past decades. Research achievements of this study can guide the transformation of local land type and  
284 help people to utilize land resource better on the premise of natural scenery protection.

285 Research methods for land use and cover include remote sensing data method, model research method  
286 and field observation method (Iqbal et al., 2014; Trabaquini et al., 2014). This study made an automatic  
287 classification of land use and covers in the Qiantang River and made a time-space analysis on land use  
288 and cover of the Qiantang River from 2001 to 2014. Considering the complex terrain, intensive land use  
289 and frequent changes of land use, we found a simple, efficient and high-precise automatic classification  
290 method based on multi-source data in combination with SAM. Based on the maps for classification of  
291 land use and cover of the Qiantang River in 2001, 2007 and 2014, we made a mathematical model  
292 analysis of land use and cover in the Qiantang River and figured out the rules of land use and cover in  
293 the Qiantang River. The automatic classification method integrating multi-source data and SAM is  
294 applicable to research concerning areas with complex terrain and is expected to provide an orientation  
295 for similar researches.

## 296 **5 Conclusion**

297 This study analyzed the land use and cover in the Qiantang River basin from 2001 to 2014, aiming to  
298 achieve two objective. i) The first objective is to accurately understand the land use and cover situation  
299 of the Qiantang River basin and historical time-space evolution trend. The level of land use and cover in

300 the Qiantang River basin is high and being deepened. Land use and cover information entropy in the  
301 Qiantang River basin touches the bottom in 2001, suggesting that land use and cover system has a  
302 higher degree of order and stronger constitutive property. However, it reaches the highest in 2014, which  
303 indicates that land use system increases in degree of disorder and has the minimum degree of order and  
304 poor constitutive property. **The above research results provide a realistic basis for the sustainable  
305 development of the Qiantang River basin.** ii) Degrees of balance of land use and cover structure in the  
306 Qiantang River basin from 2001 to 2014 increases continuously and degree of dominance is reduced. **It,  
307 to some extent, provides information support and analysis direction for the optimization of the land use  
308 structure of the Qiantang River basin and the optimal allocation and scientific management of land  
309 resource.**

310

### 311 **Acknowledgements**

312 This study was supported by a grant from the Science and Technology Project of Beijing Municipal  
313 Education Commission (to Sun Qiong) (No. KM201511417009)

314

### 315 **References**

316 Amuti, T. and Luo, G.: Analysis of land cover change and its driving forces in a desert oasis landscape of  
317 Xinjiang, northwest China, *Solid Earth*, 5, 1071-1085, doi: 10.5194/se-5-1071-2014, 2014.

318

319 Belay, K. T., Van Rompaey, A., Poesen, J., Van Bruyssel, S., Deckers, J., and Amare, K.: Spatial  
320 analysis of land cover changes in Eastern Tigray (Ethiopia) from 1965 to 2007: are there signs of a forest  
321 transition? *Land Degrad. Developm.*, 26, 680-689, doi: 10.1002/ldr.2275, 2014.

322

323 De Mûelenaere, S., Frankl, A., Haile, M., Poesen, J., Deckers, J., Munro, N., Veraverbeke, S., and  
324 Nyssen, J.: Historical landscape photographs for calibration of Landsat land use/cover in the Northern  
325 Ethiopian highlands, *Land Degrad. Developm.*, 25, 319-335, doi: 10.1002/ldr.2142, 2014.

326

327 Fan, F. L., Weng, Q. H., and Wang, Y. P.: Land Use and Land Cover Change in Guangzhou, China, from  
328 1998 to 2003, Based on Landsat TM /ETM+ Imagery, *Sensors*, 7, 1323-1342, 2007.

329

330 Ferreira, C. S. S., Walsh, R. P. D., Steenhuis, T. S., Shakesby, R. A., Nunes, J. P. N., Coelho, COA., and  
331 Ferreira, A. J. D.: Spatiotemporal variability of hydrologic soil properties and the implications for overland  
332 flow and land management in a peri-urban Mediterranean catchment, *J. Hydrol.*, 525, 249-263, doi:  
333 <http://dx.doi.org/10.1016/j.jhydrol.2015.03.039>, 2015.

334

335 **Fuller D. O., Parenti M., Gad A., and Beier J.: Land cover in Upper Egypt assessed using regional and  
336 global land cover products derived from MODIS imagery, *Remote Sens. Lett.*, 3:171-180, 2012.**

337 Gelaw, A. M., Singh, B. R., and Lal, R.: Organic Carbon and Nitrogen Associated with Soil Aggregates  
338 and Particle Sizes Under Different Land Uses in Tigray, Northern Ethiopia, *Land Degrad. Developm.*, 26,  
339 690-700, doi: 10.1002/ldr.2261, 2015.

340

341 Gessesse, B., Bewket, W., and Bräuning, A.: Model-based characterization and monitoring of runoff and  
342 soil erosion in response to land use/land cover changes in the Modjo Watershed, Ethiopia, *Land Degrad.*  
343 *Developm.*, 26, 711-724, doi: 10. 1002/ldr. 2276, 2015.

344

345 Garedew, E., Sandewall, M., Söderberg, U., and Campbell, B. M.: Land-use and land-cover dynamics in  
346 the central rift valley of Ethiopia, *Environm. Managem.*, 44, 683- 694, 2009.

347

348 Iqbal, M. F. and Khan, I. A.: Spatiotemporal Land Use Land Cover change analysis and erosion risk  
349 mapping of Azad Jammu and Kashmir, Pakistan, *Egypt. J. Remote Sens. Space Sci.*, 17, 209-229,  
350 2014.

351

352 Li, H., Lee, W. S., Wang, K., Ehsani, R., and Yang, C. H.: 'Extended spectral angle mapping (ESAM)' for  
353 citrus greening disease detection using airborne hyperspectral imaging, *Precis. Agricult.*, 15, 162-183,  
354 2014.

355

356 Muñoz-Rojas, M., Jordán, A., Zavala, L. M., De la Rosa D, Abd-Elmabod, S. K., and Anaya-Romero, M.:  
357 Impact of land use and land cover changes on organic carbon stocks in Mediterranean soils, *Land*  
358 *Degrad. Developm.*, 26, 168-179, doi: 10.1002/ldr.2194, 2015.

359

360 Mu, J., Khan, S., and Gao, Z.: Integrated water assessment model for water budgeting under future  
361 development scenarios in Qiantang River basin of China, *Irrigat. Drain.*, 57, 369–384, 2008.

362

363 Ochoa, P. A., Fries, A., Mejía, D., Burneo, J. I., Ruíz-Sinoga, J. D., and Cerdà, A.: Effects of climate, land  
364 cover and topography on soil erosion risk in a semiarid basin of the Andes, *Catena*, 140, 31-42.  
365 doi:10.1016/j.catena.2016.01.011, 2016.

366

367 Sanjuán, Y., Gómez-Villar, A., Nadal-Romero, E., Álvarez-Martínez, J., Arnáez, J., Serrano-Muela, M.  
368 P., Rubiales, J. M., Gon-zález-Sampériz, P., and García-Ruiz, J. M.: Linking land cover changes in the  
369 sub-slpine and montane belts to changes in a torrential river, *Land Degrad. Developm.*, 27, 179-189,  
370 doi:10.1002/ldr.2294, 2016.

371

372 Sato, T. and Suganuma, M.: Consideration of expression method of the entropy concept: correlation  
373 between the thermodynamic entropy obtained from the molecule movement animation and the  
374 psychological quantity from language expression, *Trans. Jpn. Soc. Kansei Eng.*, 12, 303-309, 2013.

375

376 Shen X., Xu H. L., Han Y. C., and Tao C. J.: Study on Water Quality Control of Qiantang River  
377 Watershed, *Environm. Sci. Managem.*, 38, 68-71, 2013.

378

379 Su S., Zhi J., Lou L., Huang F., Chen X., and Wu J. P. Spatio-temporal patterns and source  
380 apportionment of pollution in Qiantang River (China) using neural-based modeling and multivariate  
381 statistical techniques, *Phys. Chem. Earth Parts, A/b/c* 36(9–11):379-386, 2011.

382

383 Trabaquini, K., Formaggio, A. R., and Galvão L. S.: Changes in physical properties of soils with land use  
384 time in the Brazilian savanna environment, *Land Degrad. Developm.*, 26, 397-408, doi:  
385 10.1002/ldr.2222, 2015.

386

387 Verburg, P. H., Schot, P. P., Dijst, M. J., and Veldkamp, A.: Land use change modeling: current practice  
388 and research priorities, *Geojournal*, 61, 309-324, 2014.

389

390 Xia, F., Liu, X. M., Xu, J., Wang, Z. G., Huang, J. F., and Brookes, P.: Trends in the daily and extreme  
391 temperatures in the Qiantang River basin, China, *Int. J. Climatol.*, 35, 6553-6565, 2014.

392

393 Xia, F., Liu X. M., Xu J. M., Yu L. J., and Shi Z.: Precipitation change between 1960 and 2006 in the  
394 Qiantang River basin, eastern China, *Climate Res.*, 67, 257-269, 2016.

395

396 Xiao, J. F., Wang, X. D., and Yao, Y.: Underground pipe network spatial analysis in large plant with  
397 ArcGIS, *J. Comput. Appl.*, 32, 2675-2678, 2012.

398

399 Xu, Y. P., Ma, C., Pan, S. L., Zhu, Q., and Ran, Q. H.: Evaluation of a multi-site weather generator in  
400 simulating precipitation in the Qiantang River Basin, East China, *J. Zhejiang Univer. - Sci A: Appl. Phys.*  
401 *Eng.*, 15, 219-230, 2014.

402

403 Yin, J., Yin, Z. E., Zhong, H. D., and Wu, J. P.: Monitoring urban expansion and land use/land cover  
404 changes of Shanghai metropolitan area during the transitional economy (1979–2009) in China,  
405 *Environm. Monitor. Assessm.*, 177, 609-621, 2011.

406

407 Yu, B., Stott, P., Di, X. Y., and Yu, H. X.: Assessment of land cover changes and their effect on soil  
408 organic carbon and soil total nitrogen in Daqing prefecture, China. *Land Degrad. Developm.*, 25,  
409 520-531, doi: 10.1002/ldr.2169, 2014.

410

411 Zhang, F., Tiyyip, T., Feng, Z. D., Kung, H. T., Johnson, V. C., Ding, J. L., Tashpolat, N., Sawut, M., and  
412 Cui, D. W.: Spatio-temporal patterns of land use/cover changes over the past 20 years in the middle  
413 reaches of the tarim river, Xinjiang, China. *Land Degrad. Developm.*, 26, 284-299, doi: 10.1002/ldr.2206,  
414 2015.

415

416 Zhao, H. and Chen, X.: Use of normalized difference bareness index in quickly mapping bare areas from  
417 TM/ETM+, *Geosci. Remote Sens. Sympos.*, 3, 1666-1668, 2005.

418

419 Zhu, W., Wang, D. H., and Zhou, X. G.: The research of optimizing DEM resolution based on information  
420 entropy, *Remote Sens. Informat.*, 18, 79-82, 2008.

421
